# Supplementary material
Source: PubMed Central journal article supplement (PMC6878199)
Supplement: NIHMS1540951-supplement-Acknowledgment_form_1.pdf [file NIHMS1540951-supplement-Acknowledgment_form_1.pdf]

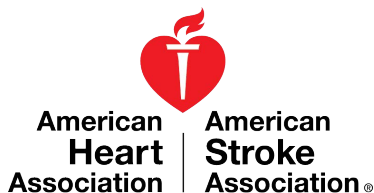

## Acknowledgment Permission Form

---

**Journal** \_\_\_\_\_

**Manuscript Number** \_\_\_\_\_

**First Author** \_\_\_\_\_

**Title of Work** \_\_\_\_\_

Authors must provide written permission/approval from all individuals mentioned by name in the Acknowledgments section of a submitted manuscript. By signing this form, any and all acknowledged persons therefore state that they have read and approved the mention of their names in the Acknowledgment section of the aforementioned paper.

|                 |                 |            |
|-----------------|-----------------|------------|
| Name (1) _____  | Signature _____ | Date _____ |
| Name (2) _____  | Signature _____ | Date _____ |
| Name (3) _____  | Signature _____ | Date _____ |
| Name (4) _____  | Signature _____ | Date _____ |
| Name (5) _____  | Signature _____ | Date _____ |
| Name (6) _____  | Signature _____ | Date _____ |
| Name (7) _____  | Signature _____ | Date _____ |
| Name (8) _____  | Signature _____ | Date _____ |
| Name (9) _____  | Signature _____ | Date _____ |
| Name (10) _____ | Signature _____ | Date _____ |
| Name (11) _____ | Signature _____ | Date _____ |
| Name (12) _____ | Signature _____ | Date _____ |
| Name (13) _____ | Signature _____ | Date _____ |
| Name (14) _____ | Signature _____ | Date _____ |
| Name (15) _____ | Signature _____ | Date _____ |
| Name (16) _____ | Signature _____ | Date _____ |
| Name (17) _____ | Signature _____ | Date _____ |
| Name (18) _____ | Signature _____ | Date _____ |
| Name (19) _____ | Signature _____ | Date _____ |
| Name (20) _____ | Signature _____ | Date _____ |
